# Supplementary material for: Preeclampsia, Fetal Growth Restriction, and 24-Month Neurodevelopment in Very Preterm Infants
Source: PubMed Central journal article supplement (PMC11227083; doi:10.1001/jamanetworkopen.2024.20382), 2024-07-05
Supplement: jamanetwopen-e2420382-s001.pdf [file jamanetwopen-e2420382-s001.pdf]

## Supplemental Online Content

Check J, Shuster C, Hofheimer J, et al. Preeclampsia, fetal growth restriction, and 24-month neurodevelopment in very preterm infants. *JAMA Netw Open*. 2024;7(7):e2420382.  
doi:10.1001/jamanetworkopen.2024.20382

**eTable 1.** Unadjusted model examining developmental outcomes at twenty-four months corrected age in infants born to mothers with and without PE

**eTable 2.** Unadjusted models examining associations between PE and FGR with 24-month corrected age developmental outcomes

**eTable 3.** Adjusted models examining associations between PE, FGR, and PE\*FGR interaction with 24-month corrected age developmental outcomes

**eTable 4.** Sensitivity analysis examining associations between PE and FGR with 24-month corrected age outcomes without NNNS or medical morbidities

This supplemental material has been provided by the authors to give readers additional information about their work.

eTable 1. Unadjusted model examining developmental outcomes at twenty-four months corrected age in infants born to mothers with and without PE.

|                        | Pre-Eclampsia | n   | Estimated Marginal Mean (SE) | <i>B (SE) [95% CI]</i>     | <i>p</i> |
|------------------------|---------------|-----|------------------------------|----------------------------|----------|
| <b>Bayley-III</b>      |               |     |                              |                            |          |
| Cognitive Composite    | Yes           | 105 | 94.57 (1.53)                 | 3.08 (1.73) [-0.32, 6.47]  | .08      |
|                        | No            | 421 | 91.50 (0.81)                 |                            |          |
| Motor Composite        | Yes           | 105 | 94.08 (1.61)                 | 2.37 (1.77) [-1.09, 5.84]  | .18      |
|                        | No            | 421 | 91.70 (0.74)                 |                            |          |
| Language Composite     | Yes           | 105 | 90.92 (1.56)                 | 3.44 (1.78) [-0.60, 6.93]  | .05      |
|                        | No            | 421 | 87.49 (0.86)                 |                            |          |
| <b>CBCL</b>            |               |     |                              |                            |          |
| Internalizing Problems | Yes           | 103 | 47.75 (1.11)                 | -0.47 (1.27) [-2.95, 2.01] | .71      |
|                        | No            | 413 | 47.91 (0.61)                 |                            |          |
| Externalizing Problems | Yes           | 103 | 48.91 (1.05)                 | -0.51 (1.22) [-2.91, 1.89] | .68      |
|                        | No            | 413 | 49.42 (0.63)                 |                            |          |
| Total Problems         | Yes           | 103 | 48.78 (1.15)                 | -0.80 (1.31) [-3.37, 1.76] | .54      |
|                        | No            | 413 | 49.58 (0.64)                 |                            |          |

*Note.* Models nested infants within sites and multiple-birth families.

eTable 2. Unadjusted models examining associations between PE and FGR with 24-month corrected age developmental outcomes.

| Unadjusted Model |                               |                     |                              |                     |                               |                     |
|------------------|-------------------------------|---------------------|------------------------------|---------------------|-------------------------------|---------------------|
|                  | Bayley-III Cognitive          |                     | Bayley-III Language          |                     | Bayley-III Motor              |                     |
|                  | <i>B (SE) [95% CI]</i>        | <i>p</i>            | <i>B (SE) [95% CI]</i>       | <i>p</i>            | <i>B (SE) [95% CI]</i>        | <i>p</i>            |
| PE               | 4.58 (1.72) [1.21, 7.95]      | .008 <sup>a</sup>   | 4.75 (1.79) [1.25, 8.25]     | .008 <sup>a</sup>   | 3.82 (1.77) [0.34, 7.30]      | .031                |
| FGR              | -10.62 (2.43) [-15.37, -5.86] | < .001 <sup>a</sup> | -9.42 (2.38) [-14.09, -4.76] | < .001 <sup>a</sup> | -10.44 (2.49) [-15.31, -5.56] | < .001 <sup>a</sup> |
|                  | CBCL Internalizing            |                     | CBCL Externalizing           |                     | CBCL Total                    |                     |
|                  | <i>B (SE) [95% CI]</i>        | <i>p</i>            | <i>B (SE) [95% CI]</i>       | <i>p</i>            | <i>B (SE) [95% CI]</i>        | <i>p</i>            |
| PE               | -0.88 (1.31) [-3.46, 1.69]    | .50                 | -0.72 (1.25) [-3.16, 1.72]   | .56                 | -1.12 (1.36) [-3.79, 1.56]    | .41                 |
| FGR              | 3.04 (1.75) [-0.39, 6.48]     | .08                 | 1.48 (1.86) [-2.18, 5.13]    | .43                 | 2.17 (1.88) [-1.52, 5.86]     | .25                 |

Abbreviation: PE, preeclampsia; FGR, fetal growth restriction.

Note. Unadjusted model nested infants within multiple-birth families and site.

<sup>a</sup> significant at Bonferroni adjusted  $\alpha = .008$ .

eTable 3. Adjusted models examining associations between PE, FGR, and PE\*FGR interaction with 24-month corrected age developmental outcomes.

| Adjusted Model |                               |                     |                              |                     |                              |                   |
|----------------|-------------------------------|---------------------|------------------------------|---------------------|------------------------------|-------------------|
|                | Bayley-III Cognitive          |                     | Bayley-III Language          |                     | Bayley-III Motor             |                   |
|                | <i>B (SE) [95% CI]</i>        | <i>p</i>            | <i>B (SE) [95% CI]</i>       | <i>p</i>            | <i>B (SE) [95% CI]</i>       | <i>p</i>          |
| PE             | 3.43 (1.65) [-0.19, 6.66]     | .04                 | 3.92 (1.77) [0.44, 7.39]     | .03                 | 1.86 (1.84) [-1.74, 5.47]    | .31               |
| FGR            | -8.61 (2.441) [-13.33, -3.89] | < .001 <sup>a</sup> | -8.29 (2.38) [-12.95, -3.63] | < .001 <sup>a</sup> | -7.60 (2.52) [-12.40, -2.66] | .003 <sup>a</sup> |
| PE *FGR        | 3.46 (4.56) [-5.48, 12.41]    | .45                 | 0.25 (4.53) [-8.63, 9.12]    | .96                 | 6.85 (4.99) [-2.93, 16.62]   | .17               |
|                | CBCL Internalizing            |                     | CBCL Externalizing           |                     | CBCL Total                   |                   |
|                | <i>B (SE) [95% CI]</i>        | <i>p</i>            | <i>B (SE) [95% CI]</i>       | <i>p</i>            | <i>B (SE) [95% CI]</i>       | <i>p</i>          |
| PE             | -0.08 (1.36) [-2.58, 2.73]    | .96                 | 0.69 (1.25) [-1.76, 3.15]    | .58                 | 0.21 (1.37) [-2.48, 2.91]    | .88               |
| FGR            | 4.12 (1.79) [0.60, 7.63]      | .02                 | 2.14 (1.83) [-1.46, 5.73]    | .24                 | 3.06 (1.85) [-0.57, 6.68]    | .10               |
| PE *FGR        | 1.20 (3.42) [-5.49, 7.90]     | .73                 | 3.97 (3.61) [-3.11, 11.05]   | .27                 | 2.91 (3.59) [-4.12, 9.94]    | .42               |

Abbreviation: PE, preeclampsia; FGR, fetal growth restriction.

Note. Adjusted models nested infants within multiple-birth families and site.

Adjusted models controlled for infant biologic sex, gestational age, hypo- and hyper-aroused neurobehavior on the NNNS, cumulative medical morbidities on the Bassler<sup>28</sup> index, partner status, low socioeconomic status based on maternal education and occupation, chorioamnionitis, antenatal steroids, maternal pre-pregnancy obesity, and maternal age at birth.

<sup>a</sup> significant at Bonferroni adjusted  $\alpha = .008$ .

eTable 4. Sensitivity analysis examining associations between PE and FGR with 24-month corrected age outcomes without NNNS or medical morbidities.

| Adjusted Model |                              |                     |                              |                     |                              |                     |
|----------------|------------------------------|---------------------|------------------------------|---------------------|------------------------------|---------------------|
|                | Bayley-III Cognitive         |                     | Bayley-III Language          |                     | Bayley-III Motor             |                     |
|                | <i>B (SE) [95% CI]</i>       | <i>p</i>            | <i>B (SE) [95% CI]</i>       | <i>P</i>            | <i>B (SE) [95% CI]</i>       | <i>p</i>            |
| PE             | 3.10 (1.64) [-0.11, 6.31]    | .06                 | 3.40 (1.75) [-0.03, 6.83]    | .05                 | 1.66 (1.80) [-1.87, 5.20]    | .36                 |
| FGR            | -9.85 (2.36) [-14.47, -5.23] | < .001 <sup>a</sup> | -9.02 (2.30) [-13.53, -4.50] | < .001 <sup>a</sup> | -9.71 (2.48) [-14.58, -4.85] | < .001 <sup>a</sup> |
|                | CBCL Internalizing           |                     | CBCL Externalizing           |                     | CBCL Total                   |                     |
|                | <i>B (SE) [95% CI]</i>       | <i>p</i>            | <i>B (SE) [95% CI]</i>       | <i>p</i>            | <i>B (SE) [95% CI]</i>       | <i>p</i>            |
| PE             | 0.09 (1.35) [-2.55, 2.73]    | .95                 | 0.38 (1.27) [-2.11, 2.86]    | .77                 | 0.04 (1.37) [-2.64, 2.72]    | .98                 |
| FGR            | 3.74 (1.77) [0.27, 7.21]     | .04                 | 1.72 (1.81) [-1.83, 5.26]    | .34                 | 2.57 (1.83) [-1.02, 6.17]    | .16                 |

Abbreviation: PE, preeclampsia; FGR, fetal growth restriction; NNNS, NICU Network Neurobehavioral Scale.

*Note.* Adjusted models nested infants within multiple-birth families and site, while controlling for infant biological sex, gestational age, partner status, low socioeconomic status based on maternal education and occupation, chorioamnionitis, antenatal steroids, maternal pre-pregnancy obesity, and maternal age at birth.

<sup>a</sup> significant at Bonferroni adjusted  $\alpha = .008$ .
