# Supplementary material for: Preeclampsia, Fetal Growth Restriction, and 24-Month Neurodevelopment in Very Preterm Infants
Source: PubMed Central journal article supplement (PMC11227083; doi:10.1001/jamanetworkopen.2024.20382), 2024-07-05
Supplement: jamanetwopen-e2420382-s002.pdf [file jamanetwopen-e2420382-s002.pdf]

## Data Sharing Statement

Check. Preeclampsia, Fetal Growth Restriction, and 24-Month Neurodevelopment in Very Preterm Infants. *JAMA Netw Open*. Published July 05, 2024.

doi:10.1001/jamanetworkopen.2024.20382

### Data

**Data available:** No

### Additional Information

**Explanation for why data not available:** The datasets generated during and/or analyzed during the current study are not publicly available, but are available from the corresponding author on reasonable request.
